# Supplementary material
Source: publisher site journal article supplement (https://www.dovepress.com/get_supplementary_file.php?f=314414.docx)
Supplement: Supplementary file 1 [file get_supplementary_file.php]

Supplements 1 Group comparisons of patients with heart failure in four groups regarding their exercise motivation and self-efficacy

|  | **Group 1- Group 2** | **Group 1-Group 3** | **Group 1-Group 4** | **Group 2- Group 3** | **Group 2-Group 4** | **Group 3-Group4** |
| --- | --- | --- | --- | --- | --- | --- |
| Age | 4.043a | -0.890a | -0.234a | -4.933 a* | -4.277a | 0.656a |
| NYHA Class | 1.16b | 8.574b* | 0.002b | 9.440b* | 1.198b | 7.625b* |
| Myocardial infarction | 12.356b** | 1.190b | 0.356b | 8.731b* | 8.881b* | 0.167b |
| COPD | 0.075b | 6.758b | 0.990b | 4.341b | 1.022b | 2.229b |
| 6MWD | -55.870a | 57.776a* | -7.220a | 113.646a* | 48.650a | 64.995a* |
| Physically active | 0.487b | 0.484b | 6.826b | 0.056b | 1.80b | 4.4988b |
| Dyspnea | -0.091a | 0.383a | 0.996a* | 0.473a | 1.087a | 0.613a |
| Anxiety symptoms1 | 2.785b | 8.786b* | 0.087b | 13.717b** | 3.443b | 6.416b |
| Depressive symptoms1 | 2.429b | 3.998b | 2.135b | 8.557b* | 0.211b | 11.686b** |
| Sleep problems2 | 2.319b | 4.868b | 0.304b | 8.959b* | 1.242b | 7.268b* |
| Cognitive impairment3 | 0.556a | 15.059a* | 6.517a | 10.157a | 3.946a | 8.468a |
| Health-related QoL | 7.048a | -9.993a* | 2.287a | -17.042a* | -4.761a | 12.280a* |
| Physical | 3.066a | -3.869a* | 1.273a | -6.965a* | -1.793a | -5.142a |
| Emotional | 2.083a | -2.857a* | 0.550a | -4.940a* | -1.533a | 3.407a* |
| Well-being (NRS 0 – 10) | -0.820a | 0.039a | -1.115a* | 0.859a* | -0.295a | 1.154a* |

COPD, Chronic Obstructive Pulmonary Disease; NRS Numeric Rating Scale; NYHA, New York Heart Association Classification; SD, Standard deviation; 6MWD, 6-minute walking distance; QoL, Quality of Life.

a measured with Hospital Anxiety and Depression Scale, cut-off point Anxiety and Depression > 7;

b measured with Minimal Insomnia Symptom Scale, cut-off point ≥ 7;

c Measured with the Montreal Cognitive Assessment, cut-off cognitive impairment point < 26;

d Mean differences in a Post hoc (Bonferroni) test, *P<0.05, **<0.01;

e Correlation coefficient in a Pearsons Chi-square test, *P<0.008, **<0.001 (corrected p-value for 6 comparisons).
